# Supplementary material for: Fe limitation decreases transcriptional regulation over the diel cycle in the model diatom Thalassiosira pseudonana
Source: PubMed Central journal article supplement (PMC6738920; doi:10.1371/journal.pone.0222325), 2019-09-11

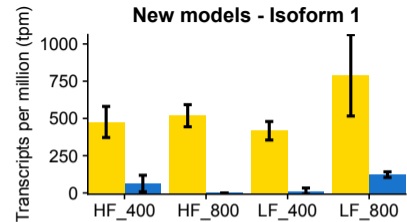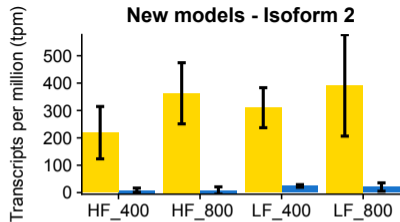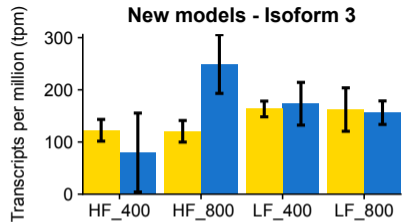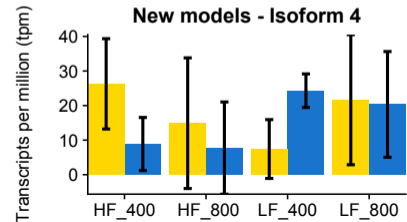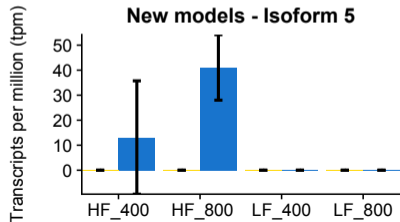

Supplement: pone.0222325.s007.pdf [file pone.0222325.s007.pdf]
